# Supplementary material
Source: PubMed Central journal article supplement (PMC5586104)
Supplement: NIHMS900215-supplement-supplemental_table_1.pdf [file NIHMS900215-supplement-supplemental_table_1.pdf]

SMILES

O=C1N(N(C(=O)C1CCCC)c1ccccc1)c1ccccc1  
Clc1ccc(NC(=NC(=NCCCCCN=C(N=C(Nc2ccc(Cl)cc2)N)N)N)N)cc1  
OC(CO)CO  
[Br-].[N+](CCCCCCCCCCCCCCCC)(C)(C)C  
Cl.S1c2c(N(c3c1ccccc3)CC(N(C)C)C)cccc2  
[Na+].[Na+].O=C([O-])C(=O)[O-]  
OCC  
OC(C)C  
O=C(C)C  
S(=O)(C)C  
Cl.Clc1cc2nc3c(cc(OC)cc3)c(NC(CCCN(CC)CC)C)c2cc1  
ClC(Cl)(Cl)C(O)=O  
OCC(C)C  
O=C(CC)C  
O(C(=O)C)C  
O1C(CO)C(O)C(O)C(O)C1=O  
O=C1NN(CC1)c1ccccc1  
Oc1ccc(cc1)C(OCCC)=O  
Oc1ccccc1N  
c1c(C)c(ccc1C)C  
ClC(CCl)CCl  
C1CCCC1C  
O1CCCC1=O  
OCCN(CCO)CCO  
OCC(CCCC)CC  
O(C(=O)CC#N)C  
OCC=C  
O=[N+](O)CCC  
O=C(CC(C)C)C  
c1ccccc1C  
OC1CCCCC1  
O=C1CCCCC1  
O(CCO)C  
o1cccc1  
OC(CCC(O)(C)C)(C)C  
C(CCC)CC  
O(CCO)CC  
n1ccccc1  
OCCCCC  
O(CCCC)CCO  
OCCCCCCCC  
c12c(cc3c(c1)cccc3)cccc2  
[Cl-].O(CCOCC[N+](Cc1ccccc1)(C)C)c1ccc(cc1)C(CC(C)(C)C)(C)C  
O=C(CC(=O)C)C  
O(C(=O)C)CCCC  
ClC(Cl)(Cl)SN1C(=O)C2C(CC=CC2)C1=O

[Br-].[n+]<sub>1</sub>(cccc1)CCCCCCCCCCCCCCC  
O(C(=O)C)CC  
O(C(=O)CC(=O)C)CC  
S(OCCCCCCCCCCC)(=O)(=O)[O-].[Na+]  
[nH]<sub>1</sub>ccnc1  
[Na+].OC1CC2C(C3CCC(C(CCC(=O)[O-])C)C13C)CCC1CC(O)CCC12C  
N1c2c(Cc3c1cccc3)cccc2  
OC(=O)C[N+](C)(C)C.[OH-]  
OC(=O)C(CC)(C)C  
O(C(=O)C(C(=O)C)C)CC  
OC(=O)c1ccc(cc1)C=O  
N(C(N=C(N)N)=N)(C)C  
S=C1NC=CC=N1  
P(OCc1cccc1)(OCc1cccc1)(O)=O  
Clc1cc(Cl)c(S(=O)(=O)N)cc1C(O)=O  
O(C(=O)c1cccc1)C(C(OC(=O)c1cccc1)C(O)=O)C(O)=O  
O(C(=O)C(C)(C)C)CC  
Clc1cccc(Cl)c1C(Cl)=O  
S(O)(O)(=O)=O.n1c(N)c(N)c(nc1N)N  
[Na+].O=C([O-])CN(CCCCCCCCCC)C  
[Cl-].[NH+](Cc1cccc1)(C)C  
O(CCCCCCCCCC)CCO  
O(CCO)c1ccc(cc1)C(CC(C)(C)C)(C)C  
O1CC(OCCO)C(OCCO)C1C(OCCO)COCCOC(=O)CCCCCCCCC  
[Mn+2].S=C([S-])NCCNC(=S)[S-]  
C12CC(CC1=CC)C=C2  
[K+].[K+].O.O.O.C(=O)CN(CCN(CC(=O)[O-])CC(O)=O)CC(=O)[O-]  
O(CCOCCOCCOCCOCCOCCOCCOCCOCCOCCOCCOCCOCCOCCOCCOCCO)CCOCCOCCOCCOCCOCCOCCOCCO  
Clc1cc(ccc1O)c1cc(C(=O)NS(=O)(=O)C([N+](=O)[O-])cc1)C(F)(F)F

| Name                               | CASRN  | Composite GHS category |
|------------------------------------|--------|------------------------|
| Phenylbutazone                     | 50339  | 0 Nonirritant          |
| Chlorhexidine                      | 55561  | 1 Category 1           |
| Glycerol                           | 56815  | 0 Nonirritant          |
| Hexadecyltrimethylammonium bromide | 57090  | 1 Category 1           |
| Promethazine hydrochloride         | 58333  | 1 Category 1           |
| Sodium oxalate                     | 62760  | 1 Category 1           |
| Ethanol                            | 64175  | 1 Category 2A          |
| Isopropanol                        | 67630  | 1 Category 2A          |
| Acetone                            | 67641  | 1 Category 2A          |
| Dimethyl sulfoxide                 | 67685  | 0 Nonirritant          |
| Quinacrine                         | 69056  | 1 Category 1           |
| Trichloroacetic acid (3%)          | 76039  | 1 Category 1           |
| Isobutanol                         | 78831  | 1 Category 2A          |
| Methyl ethyl ketone                | 78933  | 1 Category 2A          |
| Methyl acetate                     | 79209  | 1 Category 2A          |
| Gluconolactone                     | 90802  | 0 Nonirritant          |
| 1-Phenyl-3-pyrazolidone            | 92433  | 0 Nonirritant          |
| Propyl-4-hydroxybenzoate           | 94133  | 0 Nonirritant          |
| 2-Aminophenol                      | 95556  | 0 Nonirritant          |
| 1,2,4-Trimethylbenzene             | 95636  | 0 Nonirritant          |
| 1,2,3-Trichloropropane             | 96184  | 0 Nonirritant          |
| Methylcyclopentane                 | 96377  | 0 Nonirritant          |
| Butyrolactone                      | 96480  | 1 Category 2A          |
| Triethanolamine                    | 102716 | 0 Nonirritant          |
| 2-Ethyl-1-hexanol                  | 104767 | 1 Category 2A          |
| Methyl cyanoacetate                | 105340 | 1 Category 2A          |
| Allyl alcohol                      | 107186 | 1 Category 2A          |
| 1-Nitropropane                     | 108032 | 0 Nonirritant          |
| Methyl isobutyl ketone             | 108101 | 0 Nonirritant          |
| Toluene                            | 108883 | 0 Nonirritant          |
| Cyclohexanol                       | 108930 | 1 Category 1           |
| Cyclohexanone                      | 108941 | 0 Nonirritant          |
| 2-Methoxyethanol                   | 109864 | 0 Nonirritant          |
| Furan                              | 110009 | 0 Nonirritant          |
| 2,5-Dimethylhexanediol             | 110032 | 1 Category 1           |
| Hexane                             | 110543 | 0 Nonirritant          |
| 2-Ethoxyethanol                    | 110805 | 0 Nonirritant          |
| Pyridine                           | 110861 | 1 Category 1           |
| n-Hexanol                          | 111273 | 1 Category 2A          |
| Butyl cellusolve                   | 111762 | 1 Category 1           |
| n-Octanol                          | 111875 | 1 Category 2B          |
| Anthracene                         | 120127 | 0 Nonirritant          |
| Benzethonium chloride              | 121540 | 1 Category 1           |
| 2,4-Pentanedione                   | 123546 | 0 Nonirritant          |
| Butyl acetate                      | 123864 | 0 Nonirritant          |
| Captan 90 concentrate              | 133062 | 1 Category 1           |

|                                      |          |               |
|--------------------------------------|----------|---------------|
| Cetylpyridinium bromide (10%)        | 140727   | 1 Category 1  |
| Ethyl acetate                        | 141786   | 0 Nonirritant |
| Ethyl acetoacetate                   | 141979   | 0 Nonirritant |
| Sodium lauryl sulfate (15 %)         | 151213   | 1 Category 1  |
| Imidazole                            | 288324   | 1 Category 1  |
| Deoxycholic acid, sodium salt        | 302954   | 1 Category 2A |
| Iminodibenzyl                        | 494199   | 0 Nonirritant |
| Betaine monohydrate                  | 590476   | 0 Nonirritant |
| 2,2-Dimethylbutanoic acid            | 595379   | 1 SCNM        |
| Ethyl-2-methylacetoacetate           | 609143   | 0 Category 2B |
| 4-Carboxybenzaldehyde                | 619669   | 1 Category 2A |
| Dimethylbiguanide                    | 657249   | 0 Nonirritant |
| 2-Mercaptopyrimidine                 | 1450857  | 0 Nonirritant |
| Dibenzyl phosphate                   | 1623081  | 1 Category 2A |
| 2,4-Dichloro-5-sulfamoylbenzoic acid | 2736234  | 0 Nonirritant |
| Benzoyl-L-tartaric acid              | 2743386  | 1 Category 1  |
| Ethyl trimethyl acetate              | 3938952  | 0 Nonirritant |
| 2,6-Dichlorobenzoyl chloride         | 4659454  | 1 Category 2A |
| Tetraaminopyrimidine sulfate         | 5392289  | 0 Nonirritant |
| N-Lauroylsarcosine, sodium salt      | 7631983  | 0 Category 2B |
| Benzalkonium chloride (100 %)        | 8001545  | 1 Category 1  |
| BRIJ-35                              | 9002920  | 0 Nonirritant |
| Triton X-100 (10%)                   | 9002931  | 1 Category 2A |
| Tween 20                             | 9005645  | 0 Nonirritant |
| Maneb                                | 12427382 | 0 SCNM        |
| 5-Ethylidene-2-norbornene            | 16219753 | 0 Nonirritant |
| EDTA, di-potassium salt              | 25102129 | 0 Nonirritant |
| Polyethylene glycol 400              | 25322683 | 0 Nonirritant |
| Fomesafen                            | 72128020 | 0 Nonirritant |

| US EPA category | EU category |
|-----------------|-------------|
| Category IV     | Nonirritant |
| SCNM            | SCNM        |
| Category IV     | Nonirritant |
| Category I      | R41         |
| Category I      | R41         |
| Category I      | R41         |
| Category II     | Nonirritant |
| Category III    | SCNM        |
| Category II     | R36         |
| Category III    | Nonirritant |
| Category I      | R41         |
| Category I      | R41         |
| Category II     | R36         |
| Category III    | R36         |
| Category II     | R36         |
| Category IV     | Nonirritant |
| Category III    | Nonirritant |
| Category III    | Nonirritant |
| Category IV     | Nonirritant |
| Category III    | Nonirritant |
| Category III    | Nonirritant |
| Category III    | Nonirritant |
| Category II     | R36         |
| Category IV     | Nonirritant |
| Category II     | R36         |
| Category II     | R36         |
| Category III    | R36         |
| Category IV     | Nonirritant |
| Category III    | Nonirritant |
| Category III    | Nonirritant |
| Category I      | R41         |
| Category III    | Nonirritant |
| Category III    | Nonirritant |
| Category III    | Nonirritant |
| Category I      | R41         |
| Category IV     | Nonirritant |
| Category III    | Nonirritant |
| Category I      | R41         |
| Category II     | R36         |
| Category II     | R41         |
| Category III    | R36         |
| Category IV     | Nonirritant |
| Category I      | R41         |
| Category III    | Nonirritant |
| Category III    | Nonirritant |
| Category I      | R41         |

|              |             |
|--------------|-------------|
| Category I   | R41         |
| Category III | Nonirritant |
| Category III | Nonirritant |
| Category I   | R36         |
| Category I   | R41         |
| Category II  | R36         |
| Category III | Nonirritant |
| Category III | Nonirritant |
| Category I   | SCNM        |
| Category III | Nonirritant |
| Category II  | R36         |
| Category III | Nonirritant |
| Category IV  | Nonirritant |
| Category II  | R36         |
| Category III | Nonirritant |
| Category I   | R41         |
| Category III | Nonirritant |
| Category II  | SCNM        |
| Category III | Nonirritant |
| Category III | Nonirritant |
| Category I   | R41         |
| Category IV  | Nonirritant |
| Category II  | R41         |
| Category III | Nonirritant |
| Category III | SCNM        |
| Category IV  | Nonirritant |
| Category III | Nonirritant |
| Category IV  | Nonirritant |
| Category III | Nonirritant |
